# Supplementary material
Source: PubMed Central journal article supplement (PMC8515503)
Supplement: NIHMS1737287-supplement-Supplementary_material.pdf [file NIHMS1737287-supplement-Supplementary_material.pdf]

## **Supplemental Materials**

### **Table of Contents:**

#### **Supplementary Tables 1-6**

**Supplemental Table 1: Multivariable-Adjusted Linear Regression Models for LSM and Continuous Traits (using different LSM definitions)**

**Supplemental Table 2: Multivariable-Adjusted Logistic Regression Models for LSM and Dichotomous Traits (using different LSM definitions)**

**Supplemental Table 3: Multivariable-Adjusted Linear Regression Models for LSM and Continuous Traits (Using probe specific cut-off of 1 point lower when XL probe used)**

**Supplemental Table 4: Multivariable-Adjusted Logistic Regression Models for LSM and Dichotomous Traits (Using probe specific cut-off of 1 point lower when XL probe used)**

**Supplemental Table 5: Multivariable-Adjusted Linear Regression Models for LSM and Continuous Traits (adding ALT and AST to multivariable model)**

**Supplemental Table 6: Multivariable-Adjusted Logistic Regression Models for LSM and Dichotomous Traits (adding ALT and AST to multivariable model)**

**Supplemental Table 7: Multivariable-Adjusted Linear Regression Models for LSM and Continuous Traits (Excluding heavy alcohol use and history of liver disease)**

**Supplemental Table 8: Multivariable-Adjusted Logistic Regression Models for LSM and Dichotomous Traits (Excluding heavy alcohol use and history of liver disease)**

**Supplemental Table 1: Multivariable-Adjusted Linear Regression Models for LSM and Continuous Traits (using different LSM definitions)**

|                                       | Model  | Dichotomous liver fibrosis (LSM > 13.6 vs LSM ≤ 13.6 kPa) |                   |         | Dichotomous liver fibrosis (LSM ≥ 9.7 kPa vs LSM <9.7 kPa) |                   |         |
|---------------------------------------|--------|-----------------------------------------------------------|-------------------|---------|------------------------------------------------------------|-------------------|---------|
|                                       |        | β                                                         | 95% CI            | P value | β                                                          | 95% CI            | P value |
| <b>Obesity/Liver related</b>          |        |                                                           |                   |         |                                                            |                   |         |
| Body mass index (kg/m <sup>2</sup> )  | MV     | 5.125                                                     | (3.657, 6.594)    | <0.0001 | 4.439                                                      | (3.586, 5.292)    | <0.0001 |
|                                       | MV+CAP | 2.432                                                     | (1.251, 3.613)    | <0.0001 | 1.772                                                      | (1.074, 2.470)    | <0.0001 |
| Waist circumference (cm)              | MV     | 5.387                                                     | (3.917, 6.857)    | <0.0001 | 4.535                                                      | (3.682, 5.389)    | <0.0001 |
|                                       | MV+BMI | 0.679                                                     | (0.090, 1.267)    | 0.04    | 0.463                                                      | (0.116, 0.810)    | 0.009   |
|                                       | MV+CAP | 2.632                                                     | (1.465, 3.800)    | <0.0001 | 1.806                                                      | (1.115, 2.496)    | <0.0001 |
| CAP (dB/m)                            | MV     | 44.204                                                    | (29.727, 58.682)  | <0.0001 | 44.267                                                     | (35.876, 52.657)  | <0.0001 |
|                                       | MV+BMI | 13.858                                                    | (2.199, 25.517)   | 0.02    | 18.380                                                     | (11.514, 25.245)  | <0.0001 |
| Log alanine aminotransferase (IU/L)   | MV     | 0.478                                                     | (0.366, 0.590)    | <0.0001 | 0.268                                                      | (0.202, 0.334)    | <0.0001 |
|                                       | MV+BMI | 0.391                                                     | (0.281, 0.501)    | <0.0001 | 0.194                                                      | (0.129, 0.259)    | <0.0001 |
|                                       | MV+CAP | 0.371                                                     | (0.264, 0.478)    | <0.0001 | 0.162                                                      | (0.099, 0.226)    | <0.0001 |
| Log aspartate aminotransferase (IU/L) | MV     | 0.485                                                     | (0.407, 0.563)    | <0.0001 | 0.208                                                      | (0.162, 0.254)    | <0.0001 |
|                                       | MV+BMI | 0.496                                                     | (0.418, 0.574)    | <0.0001 | 0.218                                                      | (0.171, 0.265)    | <0.0001 |
|                                       | MV+CAP | 0.469                                                     | (0.391, 0.547)    | <0.0001 | 0.193                                                      | (0.146, 0.240)    | <0.0001 |
| <b>Glucose-related</b>                |        |                                                           |                   |         |                                                            |                   |         |
| Fasting glucose (mg/dl) (n=3168)      | MV     | 15.863                                                    | (10.977, 20.749)  | <0.0001 | 12.510                                                     | (9.647, 15.374)   | <0.0001 |
|                                       | MV+BMI | 12.486                                                    | (7.697, 17.275)   | <0.0001 | 9.685                                                      | (6.852, 12.517)   | <0.0001 |
|                                       | MV+CAP | 12.521                                                    | (7.795, 17.247)   | <0.0001 | 9.122                                                      | (6.320, 11.924)   | <0.0001 |
| Log hgbA1c (%)                        | MV     | 0.060                                                     | (0.037, 0.084)    | <0.0001 | 0.052                                                      | (0.038, 0.067)    | <0.0001 |
|                                       | MV+BMI | 0.043                                                     | (0.021, 0.066)    | 0.0001  | 0.038                                                      | (0.024, 0.051)    | <0.0001 |
|                                       | MV+CAP | 0.044                                                     | (0.021, 0.066)    | 0.0001  | 0.035                                                      | (0.022, 0.049)    | <0.0001 |
| <b>Vascular-related</b>               |        |                                                           |                   |         |                                                            |                   |         |
| Systolic blood pressure (mm Hg)       | MV     | 3.730                                                     | (0.246, 7.213)    | 0.04    | 3.149                                                      | (1.108, 5.190)    | 0.003   |
|                                       | MV+BMI | 1.551                                                     | (-1.873, 4.974)   | 0.37    | 1.187                                                      | (-0.835, 3.210)   | 0.25    |
|                                       | MV+CAP | 1.879                                                     | (-1.546, 5.305)   | 0.28    | 1.195                                                      | (-0.833, 3.223)   | 0.25    |
| Diastolic blood pressure (mm Hg)      | MV     | 0.170                                                     | (-2.046, 2.386)   | 0.88    | 0.120                                                      | (-1.180, 1.420)   | 0.86    |
|                                       | MV+BMI | -1.187                                                    | (-3.368, 0.993)   | 0.29    | -1.128                                                     | (-2.416, 0.160)   | 0.09    |
|                                       | MV+CAP | -0.993                                                    | (-3.173, 1.188)   | 0.37    | -1.139                                                     | (-2.430, 0.151)   | 0.08    |
| <b>Cholesterol-related</b>            |        |                                                           |                   |         |                                                            |                   |         |
| Total cholesterol (mg/dl)             | MV     | -4.24                                                     | (-13.314, 4.833)  | 0.36    | -6.558                                                     | (-11.865, -1.250) | 0.02    |
|                                       | MV+BMI | -4.281                                                    | (-13.414, 4.852)  | 0.36    | -6.746                                                     | (-12.135, -1.357) | 0.01    |
|                                       | MV+CAP | -6.105                                                    | (-15.203, 2.992)  | 0.19    | -8.684                                                     | (-14.061, -3.308) | 0.002   |
| HDL cholesterol (mg/dl)               | MV     | -7.898                                                    | (-12.424, -3.372) | 0.0006  | -8.157                                                     | (-10.799, -5.516) | <0.0001 |
|                                       | MV+BMI | -1.846                                                    | (-6.057, 2.365)   | 0.39    | -2.985                                                     | (-5.471, 0.499)   | 0.02    |
|                                       | MV+CAP | -2.898                                                    | (-7.142, 1.345)   | 0.18    | -3.221                                                     | (-5.732, -0.711)  | 0.01    |
| Log triglycerides (mg/dl)             | MV     | 0.251                                                     | (0.120, 0.382)    | 0.0002  | 0.232                                                      | (0.155, 0.308)    | <0.0001 |
|                                       | MV+BMI | 0.093                                                     | (-0.030, 0.217)   | 0.14    | 0.097                                                      | (0.024, 0.170)    | 0.009   |
|                                       | MV+CAP | 0.083                                                     | (-0.037, 0.202)   | 0.17    | 0.064                                                      | (-0.006, 0.135)   | 0.07    |

LSM, liver stiffness measurement; BMI, body mass index; CAP, controlled attenuation parameter; HgbA1c, glycosylated hemoglobin; HDL, high density lipoprotein; MV, multivariable

**Supplemental Table 2: Multivariable-Adjusted Logistic Regression Models for LSM and Dichotomous Traits (using different LSM definitions)**

|                                           | Model  | Dichotomous liver fibrosis (LSM > 13.6 vs LSM ≤ 13.6 kPa) |               |         | Dichotomous liver fibrosis (LSM ≥ 9.7 kPa vs LSM <9.7 kPa) |              |         |
|-------------------------------------------|--------|-----------------------------------------------------------|---------------|---------|------------------------------------------------------------|--------------|---------|
|                                           |        | OR                                                        | 95% CI        | P value | OR                                                         | 95% CI       | P value |
| <b>Obesity/Liver related</b>              |        |                                                           |               |         |                                                            |              |         |
| Obesity (BMI ≥ 30 kg/m <sup>2</sup> )     | MV     | 4.41                                                      | (2.45, 7.93)  | <0.0001 | 3.77                                                       | (2.71, 5.25) | <0.0001 |
|                                           | MV+CAP | 2.65                                                      | (1.26, 5.59)  | 0.01    | 2.04                                                       | (1.36, 3.07) | 0.0006  |
| Hepatic steatosis (CAP ≥ 290 dB/m)        | MV     | 4.16                                                      | (2.34, 7.39)  | <0.0001 | 3.84                                                       | (2.76, 5.35) | <0.0001 |
|                                           | MV+BMI | 2.04                                                      | (1.02, 4.10)  | 0.04    | 2.07                                                       | (1.38, 3.11) | 0.0004  |
| Severe hepatic steatosis (CAP ≥ 302 dB/m) | MV     | 4.40                                                      | (2.52, 7.70)  | <0.0001 | 4.18                                                       | (3.02, 5.79) | <0.0001 |
|                                           | MV+BMI | 2.16                                                      | (1.09, 4.28)  | 0.03    | 2.26                                                       | (1.52, 3.37) | 0.0001  |
| Elevated ALT or AST                       | MV     | 3.94                                                      | (2.02, 7.69)  | 0.0001  | 2.03                                                       | (1.43, 2.90) | 0.0001  |
|                                           | MV+BMI | 3.35                                                      | (1.71, 6.55)  | 0.0004  | 1.77                                                       | (1.23, 2.53) | 0.002   |
|                                           | MV+CAP | 3.14                                                      | (1.59, 6.19)  | 0.0009  | 1.56                                                       | (1.09, 2.24) | 0.02    |
| Metabolic syndrome                        | MV     | 3.01                                                      | (1.72, 5.28)  | 0.0001  | 3.26                                                       | (2.34, 4.53) | <0.0001 |
|                                           | MV+BMI | 1.35                                                      | (0.70, 2.63)  | 0.37    | 1.64                                                       | (1.11, 2.44) | 0.01    |
|                                           | MV+CAP | 1.35                                                      | (0.68, 2.66)  | 0.39    | 1.57                                                       | (1.06, 2.34) | 0.02    |
| <b>Glucose-related</b>                    |        |                                                           |               |         |                                                            |              |         |
| Diabetes                                  | MV     | 5.64                                                      | (3.09, 10.30) | <0.0001 | 5.34                                                       | (3.65, 7.80) | <0.0001 |
|                                           | MV+BMI | 3.16                                                      | (1.64, 6.09)  | 0.0006  | 3.07                                                       | (2.03, 4.63) | <0.0001 |
|                                           | MV+CAP | 3.06                                                      | (1.60, 5.88)  | 0.0008  | 2.85                                                       | (1.88, 4.32) | <0.0001 |
| Impaired fasting glucose (n=2992)         | MV     | 1.87                                                      | (1.46, 2.38)  | <0.0001 | 1.54                                                       | (1.14, 2.07) | 0.005   |
|                                           | MV+BMI | 1.25                                                      | (0.97, 1.62)  | 0.09    | 1.06                                                       | (0.77, 1.47) | 0.72    |
|                                           | MV+CAP | 1.27                                                      | (0.98, 1.65)  | 0.07    | 1.06                                                       | (0.77, 1.47) | 0.72    |
| <b>Vascular-related</b>                   |        |                                                           |               |         |                                                            |              |         |
| Hypertension                              | MV     | 2.48                                                      | (1.40, 4.39)  | 0.002   | 2.05                                                       | (1.47, 2.87) | <0.0001 |
|                                           | MV+BMI | 1.48                                                      | (0.81, 2.69)  | 0.20    | 1.26                                                       | (0.88, 1.81) | 0.20    |
|                                           | MV+CAP | 1.66                                                      | (0.92, 3.01)  | 0.09    | 1.36                                                       | (0.95, 1.94) | 0.09    |
| <b>Cholesterol-related</b>                |        |                                                           |               |         |                                                            |              |         |
| Dyslipidemia                              | MV     | 1.86                                                      | (1.05, 3.29)  | 0.04    | 1.22                                                       | (0.87, 1.73) | 0.25    |
|                                           | MV+BMI | 1.40                                                      | (0.79, 2.51)  | 0.25    | 0.93                                                       | (0.65, 1.33) | 0.71    |
|                                           | MV+CAP | 1.64                                                      | (0.86, 2.74)  | 0.15    | 1.00                                                       | (0.70, 1.42) | 0.99    |
| Low HDL cholesterol                       | MV     | 2.87                                                      | (1.63, 5.05)  | 0.0003  | 3.14                                                       | (2.24, 4.39) | <0.0001 |
|                                           | MV+BMI | 1.61                                                      | (0.87, 2.98)  | 0.13    | 1.98                                                       | (1.38, 2.85) | 0.0002  |
|                                           | MV+CAP | 1.56                                                      | (0.83, 2.94)  | 0.17    | 1.82                                                       | (1.25, 2.63) | 0.002   |
| High triglycerides                        | MV     | 1.96                                                      | (1.10, 3.50)  | 0.02    | 2.58                                                       | (1.84, 3.61) | <0.0001 |
|                                           | MV+BMI | 1.08                                                      | (0.58, 2.02)  | 0.80    | 1.63                                                       | (1.13, 2.34) | 0.008   |
|                                           | MV+CAP | 0.94                                                      | (0.50, 1.78)  | 0.85    | 1.36                                                       | (0.94, 1.98) | 0.11    |

LSM, liver stiffness measurement; BMI, body mass index; CAP, controlled attenuation parameter; ALT, alanine aminotransferase; AST, aspartate aminotransferase; HDL, high density lipoprotein; MV, multivariable

**Supplemental Table 3: Multivariable-Adjusted Linear Regression Models for LSM and Continuous Traits (Using probe specific cut-off of 1 point lower when XL probe used)**

|                                       | Model  | Dichotomous liver fibrosis (LSM $\geq$ 8.2 kPa vs LSM $<$ 8.2 kPa) |                   |         |
|---------------------------------------|--------|--------------------------------------------------------------------|-------------------|---------|
|                                       |        | $\beta$                                                            | 95% CI            | P value |
| <b>Obesity/Liver related</b>          |        |                                                                    |                   |         |
| Body mass index (kg/m <sup>2</sup> )  | MV     | 4.830                                                              | (4.247, 5.412)    | <0.0001 |
|                                       | MV+CAP | 2.242                                                              | (1.749, 2.735)    | <0.0001 |
| Waist circumference (cm)              | MV     | 4.711                                                              | (4.126, 5.296)    | <0.0001 |
|                                       | MV+BMI | 0.286                                                              | (0.037, 0.535)    | 0.008   |
|                                       | MV+CAP | 2.046                                                              | (1.558, 2.535)    | <0.0001 |
| CAP (dB/m)                            | MV     | 44.436                                                             | (38.673, 50.200)  | <0.0001 |
|                                       | MV+BMI | 16.920                                                             | (12.022, 21.819)  | <0.0001 |
| Log alanine aminotransferase (IU/L)   | MV     | 0.239                                                              | (0.194, 0.285)    | <0.0001 |
|                                       | MV+BMI | 0.165                                                              | (0.118, 0.211)    | <0.0001 |
|                                       | MV+CAP | 0.137                                                              | (0.092, 0.182)    | <0.0001 |
| Log aspartate aminotransferase (IU/L) | MV     | 0.143                                                              | (0.111, 0.175)    | <0.0001 |
|                                       | MV+BMI | 0.158                                                              | (0.125, 0.192)    | <0.0001 |
|                                       | MV+CAP | 0.130                                                              | (0.097, 0.164)    | <0.0001 |
| <b>Glucose-related</b>                |        |                                                                    |                   |         |
| Fasting glucose (mg/dl) (n=3168)      | MV     | 8.309                                                              | (6.296, 10.322)   | <0.0001 |
|                                       | MV+BMI | 5.174                                                              | (3.137, 7.211)    | <0.0001 |
|                                       | MV+CAP | 4.813                                                              | (2.809, 6.817)    | <0.0001 |
| Log hgbA1c (%)                        | MV     | 0.033                                                              | (0.023, 0.042)    | <0.0001 |
|                                       | MV+BMI | 0.016                                                              | (0.007, 0.026)    | 0.001   |
|                                       | MV+CAP | 0.015                                                              | (0.006, 0.025)    | 0.002   |
| <b>Vascular-related</b>               |        |                                                                    |                   |         |
| Systolic blood pressure (mm Hg)       | MV     | 3.833                                                              | (2.405, 5.262)    | <0.0001 |
|                                       | MV+BMI | 1.712                                                              | (0.265, 3.159)    | 0.02    |
|                                       | MV+CAP | 1.917                                                              | (0.474, 3.361)    | 0.009   |
| Diastolic blood pressure (mm Hg)      | MV     | 1.270                                                              | (0.358, 2.181)    | 0.006   |
|                                       | MV+BMI | -0.103                                                             | (-1.025, 0.819)   | 0.83    |
|                                       | MV+CAP | 0.019                                                              | (-0.901, 0.938)   | 0.97    |
| <b>Cholesterol-related</b>            |        |                                                                    |                   |         |
| Total cholesterol (mg/dl)             | MV     | -6.453                                                             | (-10.168, -2.739) | 0.0007  |
|                                       | MV+BMI | -6.931                                                             | (-10.784, -3.077) | 0.0004  |
|                                       | MV+CAP | -8.865                                                             | (-12.688, -5.041) | <0.0001 |
| HDL cholesterol (mg/dl)               | MV     | -7.150                                                             | (-8.991, -5.310)  | <0.0001 |
|                                       | MV+BMI | -1.538                                                             | (-3.317, 0.242)   | 0.09    |
|                                       | MV+CAP | -2.239                                                             | (-4.026, -0.453)  | 0.01    |
| Log triglycerides (mg/dl)             | MV     | 0.190                                                              | (0.137, 0.244)    | <0.0001 |
|                                       | MV+BMI | 0.043                                                              | (-0.009, 0.096)   | 0.10    |
|                                       | MV+CAP | 0.021                                                              | (-0.029, 0.072)   | 0.40    |

LSM, liver stiffness measurement; BMI, body mass index; CAP, controlled attenuation parameter; HgbA1c, glycosylated hemoglobin; HDL, high density lipoprotein; MV, multivariable

**Supplemental Table 4: Multivariable-Adjusted Logistic Regression Models for LSM and Dichotomous Traits (Using probe specific cut-off of 1 point lower when XL probe used)**

|                                           | <b>Dichotomous liver fibrosis (LSM ≥ 8.2 kPa vs LSM &lt;8.2 kPa)</b> |           |               |                |
|-------------------------------------------|----------------------------------------------------------------------|-----------|---------------|----------------|
|                                           | <b>Model</b>                                                         | <b>OR</b> | <b>95% CI</b> | <b>P value</b> |
| <b>Obesity/Liver related</b>              |                                                                      |           |               |                |
| Obesity (BMI ≥ 30 kg/m <sup>2</sup> )     | MV                                                                   | 4.20      | (3.32, 5.30)  | <0.0001        |
|                                           | MV+CAP                                                               | 2.23      | (1.69, 2.95)  | <0.0001        |
| Hepatic steatosis (CAP ≥ 290 dB/m)        | MV                                                                   | 4.66      | (3.69, 5.89)  | <0.0001        |
|                                           | MV+BMI                                                               | 2.36      | (1.77, 3.13)  | <0.0001        |
| Severe hepatic steatosis (CAP ≥ 302 dB/m) | MV                                                                   | 4.45      | (3.53, 5.60)  | <0.0001        |
|                                           | MV+BMI                                                               | 2.09      | (1.58, 2.77)  | <0.0001        |
| Elevated ALT or AST                       | MV                                                                   | 2.09      | (1.63, 2.67)  | <0.0001        |
|                                           | MV+BMI                                                               | 1.84      | (1.42, 2.37)  | <0.0001        |
|                                           | MV+CAP                                                               | 1.62      | (1.26, 2.09)  | 0.0002         |
| Metabolic syndrome                        | MV                                                                   | 3.54      | (2.80, 4.47)  | <0.0001        |
|                                           | MV+BMI                                                               | 1.59      | (1.21, 2.11)  | 0.0001         |
|                                           | MV+CAP                                                               | 1.71      | (1.30, 2.24)  | <0.0001        |
| <b>Glucose-related</b>                    |                                                                      |           |               |                |
| Diabetes                                  | MV                                                                   | 4.42      | (3.29, 5.95)  | <0.0001        |
|                                           | MV+BMI                                                               | 2.40      | (1.73, 3.32)  | <0.0001        |
|                                           | MV+CAP                                                               | 2.43      | (1.76, 3.35)  | <0.0001        |
| Impaired fasting glucose (n=2992)         | MV                                                                   | 1.87      | (1.46, 2.38)  | <0.0001        |
|                                           | MV+BMI                                                               | 1.25      | (0.97, 1.62)  | 0.09           |
|                                           | MV+CAP                                                               | 1.27      | (0.98, 1.65)  | 0.07           |
| <b>Vascular-related</b>                   |                                                                      |           |               |                |
| Hypertension                              | MV                                                                   | 2.34      | (1.85, 2.97)  | <0.0001        |
|                                           | MV+BMI                                                               | 1.42      | (1.10, 1.84)  | 0.007          |
|                                           | MV+CAP                                                               | 1.60      | (1.25, 2.06)  | 0.0002         |
| <b>Cholesterol-related</b>                |                                                                      |           |               |                |
| Dyslipidemia                              | MV                                                                   | 1.35      | (1.06, 1.72)  | 0.02           |
|                                           | MV+BMI                                                               | 1.02      | (0.79, 1.32)  | 0.89           |
|                                           | MV+CAP                                                               | 1.11      | (0.86, 1.43)  | 0.41           |
| Low HDL cholesterol                       | MV                                                                   | 2.60      | (2.03, 3.33)  | <0.0001        |
|                                           | MV+BMI                                                               | 1.54      | (1.17, 2.01)  | 0.002          |
|                                           | MV+CAP                                                               | 1.47      | (1.12, 1.93)  | 0.006          |
| High triglycerides                        | MV                                                                   | 2.12      | (1.66, 2.72)  | <0.0001        |
|                                           | MV+BMI                                                               | 1.24      | (0.94, 1.62)  | 0.13           |
|                                           | MV+CAP                                                               | 1.09      | (0.83, 1.43)  | 0.55           |

LSM, liver stiffness measurement; BMI, body mass index; CAP, controlled attenuation parameter; ALT, alanine aminotransferase; AST, aspartate aminotransferase; HDL, high density lipoprotein; MV, multivariable

**Supplemental Table 5: Multivariable-Adjusted Linear Regression Models for LSM and Continuous Traits (adding ALT and AST to multivariable model)**

| Trait                                | Model  | Dichotomous liver fibrosis<br>(LSM ≥ 8.2 kPa vs LSM <8.2 kPa) |                   |         | Continuous Log LSM (per unit increase) |                   |         |
|--------------------------------------|--------|---------------------------------------------------------------|-------------------|---------|----------------------------------------|-------------------|---------|
|                                      |        | β                                                             | 95% CI            | P value | β                                      | 95% CI            | P value |
| <b>Obesity/Liver related</b>         |        |                                                               |                   |         |                                        |                   |         |
| Body mass index (kg/m <sup>2</sup> ) | MV     | 3.665                                                         | (3.022, 4.309)    | <0.0001 | 3.855                                  | (3.335, 4.375)    | <0.0001 |
|                                      | MV+CAP | 1.909                                                         | (1.368, 2.449)    | <0.0001 | 1.979                                  | (1.534, 2.425)    | <0.0001 |
| Waist circumference (cm)             | MV     | 3.613                                                         | (2.968, 4.257)    | <0.0001 | 3.634                                  | (3.112, 4.156)    | <0.0001 |
|                                      | MV+BMI | 0.274                                                         | (0.001, 0.547)    | 0.05    | 0.119                                  | (-0.108, 0.345)   | 0.31    |
|                                      | MV+CAP | 1.805                                                         | (1.271, 2.340)    | <0.0001 | 1.692                                  | (1.25, 2.133)     | <0.0001 |
| CAP (dB/m)                           | MV     | 30.519                                                        | (24.258, 36.780)  | <0.0001 | 33.270                                 | (28.204, 38.337)  | <0.0001 |
|                                      | MV+BMI | 10.548                                                        | (5.262, 15.834)   | 0.0001  | 12.622                                 | (8.254, 16.991)   | <0.0001 |
| <b>Glucose-related</b>               |        |                                                               |                   |         |                                        |                   |         |
| Fasting glucose (mg/dl) (n=3168)     | MV     | 8.132                                                         | (5.918, 10.346)   | <0.0001 | 6.722                                  | (4.916, 8.527)    | <0.0001 |
|                                      | MV+BMI | 6.209                                                         | (3.994, 8.423)    | <0.0001 | 4.697                                  | (2.868, 6.525)    | <0.0001 |
|                                      | MV+CAP | 6.150                                                         | (3.965, 8.335)    | <0.0001 | 4.526                                  | (2.725, 6.328)    | <0.0001 |
| Log hgbA1c (%)                       | MV     | 0.028                                                         | (0.018, 0.039)    | <0.0001 | 0.028                                  | (0.019, 0.036)    | <0.0001 |
|                                      | MV+BMI | 0.018                                                         | (0.008, 0.029)    | 0.0006  | 0.017                                  | (0.008, 0.026)    | <0.0001 |
|                                      | MV+CAP | 0.019                                                         | (0.008, 0.029)    | 0.0004  | 0.017                                  | (0.008, 0.026)    | <0.0001 |
| <b>Vascular-related</b>              |        |                                                               |                   |         |                                        |                   |         |
| Systolic blood pressure (mm Hg)      | MV     | 3.026                                                         | (1.439, 4.612)    | 0.0002  | 3.373                                  | (2.074, 4.673)    | <0.0001 |
|                                      | MV+BMI | 1.483                                                         | (-0.101, 3.067)   | 0.07    | 1.795                                  | (0.482, 3.108)    | 0.007   |
|                                      | MV+CAP | 1.818                                                         | (0.236, 3.400)    | 0.02    | 2.092                                  | (0.782, 3.402)    | 0.002   |
| Diastolic blood pressure (mm Hg)     | MV     | 0.488                                                         | (-0.520, 1.495)   | 0.34    | 0.726                                  | (-0.101, 1.553)   | 0.09    |
|                                      | MV+BMI | -0.456                                                        | (-1.463, 0.552)   | 0.38    | -0.265                                 | (-1.100, 0.571)   | 0.53    |
|                                      | MV+CAP | -0.253                                                        | (-1.259, 0.753)   | 0.62    | -0.082                                 | (-0.915, 0.752)   | 0.85    |
| <b>Cholesterol-related</b>           |        |                                                               |                   |         |                                        |                   |         |
| Total cholesterol (mg/dl)            | MV     | -9.012                                                        | (-13.155, -4.868) | <0.0001 | -7.352                                 | (-10.743, -3.962) | <0.0001 |
|                                      | MV+BMI | -8.801                                                        | (-13.020, -4.582) | <0.0001 | -7.227                                 | (-10.722, -3.732) | 0.0001  |
|                                      | MV+CAP | -10.089                                                       | (-14.282, -5.895) | <0.0001 | -8.650                                 | (-12.117, -5.182) | <0.0001 |
| HDL cholesterol (mg/dl)              | MV     | -5.576                                                        | (-7.603, -3.550)  | <0.0001 | -6.069                                 | (-7.721, -4.416)  | <0.0001 |
|                                      | MV+BMI | -1.659                                                        | (-3.602, 0.284)   | 0.09    | -2.006                                 | (-3.615, -0.397)  | 0.01    |
|                                      | MV+CAP | -2.466                                                        | (-4.416, -0.515)  | 0.01    | -2.736                                 | (-4.349, -1.124)  | 0.0009  |
| Log triglycerides (mg/dl)            | MV     | 0.116                                                         | (0.058, 0.174)    | <0.0001 | 0.159                                  | (0.111, 0.206)    | <0.0001 |
|                                      | MV+BMI | 0.018                                                         | (-0.039, 0.074)   | 0.54    | 0.058                                  | (0.011, 0.105)    | 0.01    |
|                                      | MV+CAP | 0.012                                                         | (-0.043, 0.066)   | 0.68    | 0.047                                  | (0.002, 0.092)    | 0.04    |

LSM, liver stiffness measurement; CAP, controlled attenuation parameter; HgbA1c, glycosylated hemoglobin; HDL, high density lipoprotein; MV, multivariable

**Supplemental Table 6: Multivariable-Adjusted Logistic Regression Models for LSM and Dichotomous Traits (adding ALT and AST to multivariable model)**

|                                           | Model  | Dichotomous liver fibrosis<br>(LSM ≥ 8.2 kPa vs LSM <8.2 kPa) |              |         | Continuous Log LSM (per unit increase) |              |         |
|-------------------------------------------|--------|---------------------------------------------------------------|--------------|---------|----------------------------------------|--------------|---------|
|                                           |        | OR                                                            | 95% CI       | P value | OR                                     | 95% CI       | P value |
| <b>Obesity/Liver related,</b>             |        |                                                               |              |         |                                        |              |         |
| Obesity (BMI ≥30 kg/m <sup>2</sup> )      | MV     | 3.05                                                          | (2.33, 3.99) | <0.0001 | 4.41                                   | (3.44, 5.65) | <0.0001 |
|                                           | MV+CAP | 1.98                                                          | (1.44, 2.71) | 0.0001  | 2.75                                   | (2.08, 3.62) | <0.0001 |
| Hepatic steatosis (CAP ≥ 290 dB/m)        | MV     | 3.25                                                          | (2.48, 4.26) | <0.0001 | 3.94                                   | (3.06, 5.07) | <0.0001 |
|                                           | MV+BMI | 1.88                                                          | (1.36, 2.62) | 0.0003  | 1.98                                   | (1.49, 2.64) | 0.001   |
| Severe hepatic steatosis (CAP ≥ 302 dB/m) | MV     | 3.01                                                          | (2.30, 3.95) | <0.0001 | 5.14                                   | (3.82, 6.92) | <0.0001 |
|                                           | MV+BMI | 1.60                                                          | (1.16, 2.22) | 0.002   | 2.37                                   | (1.70, 3.30) | <0.0001 |
| Metabolic syndrome                        | MV     | 2.43                                                          | (1.85, 3.19) | <0.0001 | 3.53                                   | (2.73, 4.56) | <0.0001 |
|                                           | MV+BMI | 1.26                                                          | (0.91, 1.73) | 0.03    | 1.73                                   | (1.30, 2.29) | 0.0007  |
|                                           | MV+CAP | 1.41                                                          | (1.04, 1.92) | 0.004   | 2.02                                   | (1.53, 2.67) | 0.0001  |
| <b>Glucose-related</b>                    |        |                                                               |              |         |                                        |              |         |
| Diabetes                                  | MV     | 4.21                                                          | (3.04, 5.83) | <0.0001 | 5.67                                   | (3.98, 8.07) | <0.0001 |
|                                           | MV+BMI | 2.57                                                          | (1.81, 3.66) | <0.0001 | 3.32                                   | (2.30, 4.79) | <0.0001 |
|                                           | MV+CAP | 2.78                                                          | (1.97, 3.92) | <0.0001 | 3.69                                   | (2.56, 5.32) | <0.0001 |
| Impaired fasting glucose (n=2992)         | MV     | 1.41                                                          | (1.03, 1.92) | 0.03    | 1.67                                   | (1.30, 2.15) | 0.0001  |
|                                           | MV+BMI | 1.00                                                          | (0.71, 1.39) | 0.98    | 1.16                                   | (0.89, 1.52) | 0.27    |
|                                           | MV+CAP | 1.05                                                          | (0.75, 1.46) | 0.78    | 1.24                                   | (0.95, 1.62) | 0.11    |
| <b>Vascular-related,</b>                  |        |                                                               |              |         |                                        |              |         |
| Hypertension                              | MV     | 1.78                                                          | (1.35, 2.33) | <0.0001 | 2.13                                   | (1.68, 2.71) | <0.0001 |
|                                           | MV+BMI | 1.19                                                          | (0.89, 1.59) | 0.23    | 1.41                                   | (1.09, 1.82) | 0.008   |
|                                           | MV+CAP | 1.38                                                          | (1.04, 1.82) | 0.03    | 1.65                                   | (1.28, 2.11) | 0.0001  |
| <b>Cholesterol-related,</b>               |        |                                                               |              |         |                                        |              |         |
| Dyslipidemia                              | MV     | 1.18                                                          | (0.90, 1.55) | 0.23    | 1.24                                   | (0.98, 1.57) | 0.07    |
|                                           | MV+BMI | 0.96                                                          | (0.72, 1.28) | 0.79    | 1.00                                   | (0.78, 1.28) | 0.99    |
|                                           | MV+CAP | 1.06                                                          | (0.80, 1.40) | 0.69    | 1.11                                   | (0.87, 1.41) | 0.41    |
| Low HDL cholesterol                       | MV     | 2.09                                                          | (1.58, 2.77) | <0.0001 | 2.54                                   | (1.96, 3.28) | <0.0001 |
|                                           | MV+BMI | 1.41                                                          | (1.04, 1.90) | 0.03    | 1.68                                   | (1.28, 2.21) | 0.0002  |
|                                           | MV+CAP | 1.42                                                          | (1.05, 1.92) | 0.02    | 1.70                                   | (1.29, 2.22) | 0.0001  |
| High triglycerides                        | MV     | 1.64                                                          | (1.23, 2.19) | 0.0007  | 2.14                                   | (1.65, 2.76) | <0.0001 |
|                                           | MV+BMI | 1.10                                                          | (0.81, 1.50) | 0.54    | 1.41                                   | (1.07, 1.85) | 0.01    |
|                                           | MV+CAP | 1.04                                                          | (0.77, 1.42) | 0.79    | 1.32                                   | (1.00, 1.75) | 0.05    |

LSM, liver stiffness measurement; BMI, body mass index; CAP, controlled attenuation parameter; ALT, alanine aminotransferase; AST, aspartate aminotransferase; HDL, high density lipoprotein; MV, multivariable

**Supplemental Table 7: Multivariable-Adjusted Linear Regression Models for LSM and Continuous Traits (Excluding heavy alcohol use and history of liver disease)**

|                                       | Model  | Dichotomous liver fibrosis (LSM ≥ 8.2 kPa vs LSM <8.2 kPa) |                   |         | Continuous Log LSM (per unit increase) |                   |         |
|---------------------------------------|--------|------------------------------------------------------------|-------------------|---------|----------------------------------------|-------------------|---------|
|                                       |        | β                                                          | 95% CI            | P value | β                                      | 95% CI            | P value |
| <b>Obesity/Liver related</b>          |        |                                                            |                   |         |                                        |                   |         |
| Body mass index (kg/m <sup>2</sup> )  | MV     | 3.931                                                      | (3.256, 4.605)    | <0.0001 | 4.039                                  | (3.506, 4.571)    | <0.0001 |
|                                       | MV+CAP | 1.711                                                      | (1.155, 2.267)    | <0.0001 | 1.758                                  | (1.307, 2.208)    | <0.0001 |
| Waist circumference (cm)              | MV     | 3.845                                                      | (3.168, 4.521)    | <0.0001 | 3.813                                  | (3.277, 4.349)    | <0.0001 |
|                                       | MV+BMI | 0.234                                                      | (-0.044, 0.513)   | 0.10    | 0.100                                  | (-0.126, 0.326)   | 0.38    |
|                                       | MV+CAP | 1.561                                                      | (1.011, 2.112)    | <0.0001 | 1.451                                  | (1.005, 1.897)    | <0.0001 |
| CAP (dB/m)                            | MV     | 37.262                                                     | (30.608, 43.916)  | <0.0001 | 39.060                                 | (33.804, 44.315)  | <0.0001 |
|                                       | MV+BMI | 14.466                                                     | (8.970, 19.963)   | <0.0001 | 16.107                                 | (11.661, 20.553)  | <0.0001 |
| Log alanine aminotransferase (IU/L)   | MV     | 0.207                                                      | (0.155, 0.258)    | <0.0001 | 0.264                                  | (0.223, 0.304)    | <0.0001 |
|                                       | MV+BMI | 0.145                                                      | (0.093, 0.196)    | <0.0001 | 0.208                                  | (0.167, 0.249)    | <0.0001 |
|                                       | MV+CAP | 0.121                                                      | (0.071, 0.172)    | <0.0001 | 0.181                                  | (0.141, 0.222)    | <0.0001 |
| Log aspartate aminotransferase (IU/L) | MV     | 0.137                                                      | (0.101, 0.173)    | <0.0001 | 0.164                                  | (0.135, 0.192)    | <0.0001 |
|                                       | MV+BMI | 0.147                                                      | (0.110, 0.183)    | <0.0001 | 0.180                                  | (0.151, 0.209)    | <0.0001 |
|                                       | MV+CAP | 0.126                                                      | (0.089, 0.162)    | <0.0001 | 0.157                                  | (0.128, 0.187)    | <0.0001 |
| <b>Glucose-related</b>                |        |                                                            |                   |         |                                        |                   |         |
| Fasting glucose (mg/dl), n=3012       | MV     | 9.179                                                      | (6.872, 11.487)   | <0.0001 | 7.672                                  | (5.830, 9.515)    | <0.0001 |
|                                       | MV+BMI | 6.676                                                      | (4.381, 8.971)    | <0.0001 | 5.114                                  | (3.256, 6.972)    | <0.0001 |
|                                       | MV+CAP | 6.312                                                      | (4.046, 8.578)    | <0.0001 | 4.641                                  | (2.806, 6.476)    | <0.0001 |
| Log hgbA1c (%)                        | MV     | 0.034                                                      | (0.023, 0.045)    | <0.0001 | 0.034                                  | (0.025, 0.043)    | <0.0001 |
|                                       | MV+BMI | 0.022                                                      | (0.011, 0.033)    | <0.0001 | 0.021                                  | (0.013, 0.030)    | <0.0001 |
|                                       | MV+CAP | 0.020                                                      | (0.010, 0.031)    | 0.0001  | 0.019                                  | (0.011, 0.028)    | <0.0001 |
| <b>Vascular-related</b>               |        |                                                            |                   |         |                                        |                   |         |
| Systolic blood pressure (mm Hg)       | MV     | 3.697                                                      | (2.083, 5.311)    | <0.0001 | 3.970                                  | (2.675, 5.266)    | 0.0001  |
|                                       | MV+BMI | 1.986                                                      | (0.379, 5.593)    | 0.02    | 2.265                                  | (0.959, 3.571)    | 0.0007  |
|                                       | MV+CAP | 2.102                                                      | (0.494, 3.711)    | 0.01    | 2.346                                  | (1.038, 3.654)    | 0.0004  |
| Diastolic blood pressure (mm Hg)      | MV     | 0.865                                                      | (-0.156, 1.885)   | 0.10    | 1.099                                  | (0.278, 1.919)    | 0.009   |
|                                       | MV+BMI | -0.248                                                     | (-1.263, 0.767)   | 0.63    | -0.040                                 | (-0.865, 0.786)   | 0.93    |
|                                       | MV+CAP | -0.174                                                     | (-1.190, 0.842)   | 0.74    | 0.010                                  | (-0.816, 0.837)   | 0.98    |
| <b>Cholesterol-related</b>            |        |                                                            |                   |         |                                        |                   |         |
| Total cholesterol (mg/dl)             | MV     | -7.694                                                     | (-11.878, -3.509) | 0.0003  | -5.758                                 | (-9.111, -2.404)  | 0.0008  |
|                                       | MV+BMI | -8.133                                                     | (-12.398, -3.867) | 0.0002  | -6.291                                 | (-9.755, -2.827)  | 0.0004  |
|                                       | MV+CAP | -9.605                                                     | (-13.851, -5.359) | <0.0001 | -7.899                                 | (-11.348, -4.450) | <0.0001 |
| HDL cholesterol (mg/dl)               | MV     | -6.260                                                     | (-8.320, -4.200)  | <0.0001 | -6.794                                 | (-8.436, -5.152)  | <0.0001 |
|                                       | MV+BMI | -1.798                                                     | (-3.750, 0.155)   | 0.07    | -2.286                                 | (-3.871, -0.702)  | 0.005   |
|                                       | MV+CAP | -2.178                                                     | (-4.142, -0.213)  | 0.03    | -2.595                                 | (-4.190, -1.001)  | 0.001   |
| Log triglycerides (mg/dl)             | MV     | 0.157                                                      | (0.096, 0.217)    | <0.0001 | 0.201                                  | (0.153, 0.249)    | <0.0001 |
|                                       | MV+BMI | 0.035                                                      | (-0.023, 0.092)   | 0.24    | 0.080                                  | (0.033, 0.127)    | 0.0008  |
|                                       | MV+CAP | 0.013                                                      | (-0.043, 0.069)   | 0.64    | 0.054                                  | (0.008, 0.099)    | 0.02    |

LSM, liver stiffness measurement; BMI, body mass index; CAP, controlled attenuation parameter; HgbA1c, glycosylated hemoglobin; HDL, high density lipoprotein; MV, multivariable



**Supplemental Table 8: Multivariable-Adjusted Logistic Regression Models for LSM and Dichotomous Traits (Excluding heavy alcohol use and history of liver disease)**

|                                           | Model  | Dichotomous liver fibrosis (LSM ≥ 8.2 kPa vs LSM <8.2 kPa) |              |         | Continuous Log LSM (per unit increase) |              |         |
|-------------------------------------------|--------|------------------------------------------------------------|--------------|---------|----------------------------------------|--------------|---------|
|                                           |        | OR                                                         | 95% CI       | P value | OR                                     | 95% CI       | P value |
| <b>Obesity/Liver related</b>              |        |                                                            |              |         |                                        |              |         |
| Obesity (BMI ≥ 30 kg/m <sup>2</sup> )     | MV     | 3.21                                                       | (2.47, 4.16) | <0.0001 | 4.42                                   | (3.48, 5.62) | <0.0001 |
|                                           | MV+CAP | 1.89                                                       | (1.38, 2.59) | 0.0001  | 2.47                                   | (1.89, 3.24) | <0.0001 |
| Hepatic steatosis (CAP ≥ 290 dB/m)        | MV     | 3.53                                                       | (2.72, 4.57) | <0.0001 | 4.39                                   | (3.44, 5.60) | <0.0001 |
|                                           | MV+BMI | 2.05                                                       | (1.49, 2.82) | <0.0001 | 2.23                                   | (1.68, 2.94) | <0.0001 |
| Severe hepatic steatosis (CAP ≥ 302 dB/m) | MV     | 3.44                                                       | (2.65, 4.46) | <0.0001 | 6.06                                   | (4.55, 8.09) | <0.0001 |
|                                           | MV+BMI | 1.87                                                       | (1.36, 2.56) | 0.0001  | 2.98                                   | (2.17, 4.10) | <0.0001 |
| Elevated ALT or AST                       | MV     | 1.90                                                       | (1.44, 2.50) | <0.0001 | 2.33                                   | (1.86, 2.97) | <0.0001 |
|                                           | MV+BMI | 1.71                                                       | (1.29, 2.26) | 0.0002  | 2.14                                   | (1.70, 2.70) | <0.0001 |
|                                           | MV+CAP | 1.54                                                       | (1.16, 2.04) | 0.003   | 1.90                                   | (1.51, 2.39) | <0.0001 |
| Metabolic syndrome                        | MV     | 2.66                                                       | (2.04, 3.46) | <0.0001 | 3.91                                   | (3.05, 5.02) | <0.0001 |
|                                           | MV+BMI | 1.35                                                       | (0.98, 1.86) | 0.06    | 2.14                                   | (1.47, 2.56) | 0.0007  |
|                                           | MV+CAP | 1.38                                                       | (1.01, 1.88) | 0.04    | 2.02                                   | (1.53, 2.67) | 0.0001  |
| <b>Glucose-related</b>                    |        |                                                            |              |         |                                        |              |         |
| Diabetes                                  | MV     | 4.54                                                       | (3.29, 6.27) | <0.0001 | 5.50                                   | (3.92, 7.71) | <0.0001 |
|                                           | MV+BMI | 2.67                                                       | (1.87, 3.79) | <0.0001 | 3.27                                   | (2.30, 4.66) | 0.0001  |
|                                           | MV+CAP | 2.68                                                       | (1.89, 3.79) | <0.0001 | 3.32                                   | (2.33, 4.73) | <0.0001 |
| Impaired fasting glucose (n=2843)         | MV     | 1.48                                                       | (1.08, 2.02) | 0.01    | 1.80                                   | (1.40, 2.31) | <0.0001 |
|                                           | MV+BMI | 1.03                                                       | (0.73, 1.44) | 0.88    | 1.21                                   | (0.93, 1.58) | 0.15    |
|                                           | MV+CAP | 1.02                                                       | (0.73, 1.43) | 0.89    | 1.24                                   | (0.95, 1.62) | 0.12    |
| <b>Vascular-related</b>                   |        |                                                            |              |         |                                        |              |         |
| Hypertension                              | MV     | 2.04                                                       | (1.56, 2.67) | <0.0001 | 2.44                                   | (1.93, 3.09) | <0.0001 |
|                                           | MV+BMI | 1.33                                                       | (1.00, 1.78) | 0.05    | 1.57                                   | (1.22, 2.02) | 0.0004  |
|                                           | MV+CAP | 1.45                                                       | (1.10, 1.93) | 0.009   | 1.73                                   | (1.35, 2.22) | <0.0001 |
| <b>Cholesterol-related</b>                |        |                                                            |              |         |                                        |              |         |
| Dyslipidemia                              | MV     | 1.29                                                       | (0.98, 1.69) | 0.07    | 1.33                                   | (1.06, 1.67) | 0.02    |
|                                           | MV+BMI | 1.00                                                       | (0.75, 1.34) | 0.98    | 1.03                                   | (0.81, 1.31) | 0.81    |
|                                           | MV+CAP | 1.07                                                       | (0.81, 1.43) | 0.62    | 1.10                                   | (0.87, 1.40) | 0.43    |
| Low HDL cholesterol                       | MV     | 2.36                                                       | (1.79, 3.10) | <0.0001 | 2.81                                   | (2.19, 3.61) | <0.0001 |
|                                           | MV+BMI | 1.53                                                       | (1.13, 2.06) | 0.006   | 1.84                                   | (1.41, 2.39) | <0.0001 |
|                                           | MV+CAP | 1.46                                                       | (1.08, 1.98) | 0.01    | 1.74                                   | (1.33, 2.27) | <0.0001 |
| High triglycerides                        | MV     | 1.88                                                       | (1.42, 2.49) | <0.0001 | 2.29                                   | (1.78, 2.93) | <0.0001 |
|                                           | MV+BMI | 1.18                                                       | (0.87, 1.60) | 0.29    | 1.45                                   | (1.11, 1.89) | 0.006   |
|                                           | MV+CAP | 1.04                                                       | (0.76, 1.42) | 0.80    | 1.27                                   | (0.96, 1.67) | 0.09    |

LSM, liver stiffness measurement; BMI, body mass index; CAP, controlled attenuation parameter; ALT, alanine aminotransferase; AST, aspartate aminotransferase; HDL, high density lipoprotein; MV, multivariable
